# Supplementary material
Source: publisher figshare collection journal article supplement (https://springernature.figshare.com/ndownloader/files/28130856)
Supplement: Supplementary file 1 [file 28130856]

datetime	id	value
1556679600	3	0.049
1556680500	3	0.05
1556681400	3	0.049
1556682300	3	0.05
1556683200	3	0.051
1556684100	3	0.05
1556685000	3	0.05
1556685900	3	0.05
1556686800	3	0.05
1556687700	3	0.049
1556688600	3	0.05
1556689500	3	0.049
1556690400	3	0.049
1556691300	3	0.05
1556692200	3	0.049
1556693100	3	0.049
1556694000	3	0.048
1556694900	3	0.049
1556695800	3	0.049
1556696700	3	0.048
1556697600	3	0.049
1556698500	3	0.049
1556699400	3	0.049
1556700300	3	0.05
1556701200	3	0.05
1556702100	3	0.051
1556703000	3	0.05
1556703900	3	0.051
1556704800	3	0.049
1556705700	3	0.035
1556706600	3	0.0
1556707500	3	0.0
1556708400	3	0.0
1556709300	3	0.0
1556710200	3	0.0
1556711100	3	0.0
1556712000	3	0.0
1556712900	3	0.0
1556713800	3	0.0
1556714700	3	0.0
1556715600	3	0.0
1556716500	3	0.0
1556717400	3	0.0
1556718300	3	0.0
1556719200	3	0.0
1556720100	3	0.0
1556721000	3	0.0
1556721900	3	0.0
1556722800	3	0.0
1556723700	3	0.0
1556724600	3	0.0
1556725500	3	0.0
1556726400	3	0.0
1556727300	3	0.0
1556728200	3	0.0
1556729100	3	0.0
1556730000	3	0.0
1556730900	3	0.0
1556731800	3	0.0
1556732700	3	0.0
1556733600	3	0.0
1556734500	3	0.0
1556735400	3	0.0
1556736300	3	0.0
1556737200	3	0.0
1556738100	3	0.0
1556739000	3	0.0
1556739900	3	0.0
1556740800	3	0.0
1556741700	3	0.0
1556742600	3	0.0
1556743500	3	0.0
1556744400	3	0.012
1556745300	3	0.039
1556746200	3	0.046
1556747100	3	0.047
1556748000	3	0.047
1556748900	3	0.047
1556749800	3	0.047
1556750700	3	0.048
1556751600	3	0.048
1556752500	3	0.048
1556753400	3	0.048
1556754300	3	0.048
1556755200	3	0.048
1556756100	3	0.048
1556757000	3	0.048
1556757900	3	0.049
1556758800	3	0.048
1556759700	3	0.049
1556760600	3	0.049
1556761500	3	0.048
1556762400	3	0.049
1556763300	3	0.048
1556764200	3	0.049
1556765100	3	0.049
1556766000	3	0.049
1556766900	3	0.048
1556767800	3	0.047
1556768700	3	0.048
1556769600	3	0.048
1556770500	3	0.048
1556771400	3	0.048
1556772300	3	0.048
1556773200	3	0.048
1556774100	3	0.048
1556775000	3	0.048
1556775900	3	0.047
1556776800	3	0.047
1556777700	3	0.047
1556778600	3	0.047
1556779500	3	0.048
1556780400	3	0.047
1556781300	3	0.047
1556782200	3	0.047
1556783100	3	0.047
1556784000	3	0.047
1556784900	3	0.047
1556785800	3	0.047
1556786700	3	0.047
1556787600	3	0.047
1556788500	3	0.047
1556789400	3	0.047
1556790300	3	0.047
1556791200	3	0.047
1556792100	3	0.03
1556793000	3	0.0
1556793900	3	0.0
1556794800	3	0.0
1556795700	3	0.0
1556796600	3	0.0
1556797500	3	0.0
1556798400	3	0.0
1556799300	3	0.0
1556800200	3	0.0
1556801100	3	0.0
1556802000	3	0.0
1556802900	3	0.0
1556803800	3	0.0
1556804700	3	0.0
1556805600	3	0.0
1556806500	3	0.0
1556807400	3	0.0
1556808300	3	0.0
1556809200	3	0.0
1556810100	3	0.0
1556811000	3	0.0
1556811900	3	0.0
1556812800	3	0.0
1556813700	3	0.0
1556814600	3	0.0
1556815500	3	0.0
1556816400	3	0.0
1556817300	3	0.0
1556818200	3	0.0
1556819100	3	0.0
1556820000	3	0.0
1556820900	3	0.0
1556821800	3	0.0
1556822700	3	0.0
1556823600	3	0.0
1556824500	3	0.0
1556825400	3	0.0
1556826300	3	0.0
1556827200	3	0.0
1556828100	3	0.0
1556829000	3	0.0
1556829900	3	0.0
1556830800	3	0.004
1556831700	3	0.035
1556832600	3	0.047
1556833500	3	0.048
1556834400	3	0.048
1556835300	3	0.047
1556836200	3	0.048
1556837100	3	0.048
1556838000	3	0.048
1556838900	3	0.048
1556839800	3	0.048
1556840700	3	0.048
1556841600	3	0.048
1556842500	3	0.047
1556843400	3	0.049
1556844300	3	0.048
1556845200	3	0.048
1556846100	3	0.049
1556847000	3	0.049
1556847900	3	0.049
1556848800	3	0.048
1556849700	3	0.049
1556850600	3	0.048
1556851500	3	0.048
1556852400	3	0.049
1556853300	3	0.049
1556854200	3	0.049
1556855100	3	0.049
1556856000	3	0.049
1556856900	3	0.049
1556857800	3	0.05
1556858700	3	0.049
1556859600	3	0.049
1556860500	3	0.049
1556861400	3	0.05
1556862300	3	0.049
1556863200	3	0.049
1556864100	3	0.049
1556865000	3	0.049
1556865900	3	0.049
1556866800	3	0.049
1556867700	3	0.05
1556868600	3	0.049
1556869500	3	0.05
1556870400	3	0.049
1556871300	3	0.049
1556872200	3	0.048
1556873100	3	0.049
1556874000	3	0.049
1556874900	3	0.049
1556875800	3	0.05
1556876700	3	0.049
1556877600	3	0.05
1556878500	3	0.047
1556879400	3	0.023
1556880300	3	0.003
1556881200	3	0.0
1556882100	3	0.0
1556883000	3	0.0
1556883900	3	0.0
1556884800	3	0.0
1556885700	3	0.0
1556886600	3	0.0
1556887500	3	0.0
1556888400	3	0.0
1556889300	3	0.0
1556890200	3	0.0
1556891100	3	0.0
1556892000	3	0.0
1556892900	3	0.0
1556893800	3	0.0
1556894700	3	0.0
1556895600	3	0.0
1556896500	3	0.0
1556897400	3	0.0
1556898300	3	0.0
1556899200	3	0.0
1556900100	3	0.0
1556901000	3	0.0
1556901900	3	0.0
1556902800	3	0.0
1556903700	3	0.0
1556904600	3	0.0
1556905500	3	0.0
1556906400	3	0.0
1556907300	3	0.0
1556908200	3	0.0
1556909100	3	0.0
1556910000	3	0.0
1556910900	3	0.0
1556911800	3	0.0
1556912700	3	0.0
1556913600	3	0.0
1556914500	3	0.0
1556915400	3	0.0
1556916300	3	0.0
1556917200	3	0.0
1556918100	3	0.034
1556919000	3	0.046
1556919900	3	0.046
1556920800	3	0.046
1556921700	3	0.046
1556922600	3	0.046
1556923500	3	0.046
1556924400	3	0.046
1556925300	3	0.046
1556926200	3	0.046
1556927100	3	0.047
1556928000	3	0.046
1556928900	3	0.047
1556929800	3	0.046
1556930700	3	0.047
1556931600	3	0.048
1556932500	3	0.047
1556933400	3	0.048
1556934300	3	0.047
1556935200	3	0.047
1556936100	3	0.048
1556937000	3	0.048
1556937900	3	0.048
1556938800	3	0.048
1556939700	3	0.048
1556940600	3	0.048
1556941500	3	0.049
1556942400	3	0.049
1556943300	3	0.048
1556944200	3	0.049
1556945100	3	0.049
1556946000	3	0.05
1556946900	3	0.049
1556947800	3	0.05
1556948700	3	0.049
1556949600	3	0.05
1556950500	3	0.049
1556951400	3	0.05
1556952300	3	0.049
1556953200	3	0.05
1556954100	3	0.049
1556955000	3	0.05
1556955900	3	0.049
1556956800	3	0.05
1556957700	3	0.049
1556958600	3	0.05
1556959500	3	0.05
1556960400	3	0.049
1556961300	3	0.05
1556962200	3	0.049
1556963100	3	0.05
1556964000	3	0.05
1556964900	3	0.049
1556965800	3	0.032
1556966700	3	0.0
1556967600	3	0.0
1556968500	3	0.0
1556969400	3	0.0
1556970300	3	0.0
1556971200	3	0.0
1556972100	3	0.0
1556973000	3	0.0
1556973900	3	0.0
1556974800	3	0.0
1556975700	3	0.0
1556976600	3	0.0
1556977500	3	0.0
1556978400	3	0.0
1556979300	3	0.0
1556980200	3	0.0
1556981100	3	0.0
1556982000	3	0.0
1556982900	3	0.0
1556983800	3	0.0
1556984700	3	0.0
1556985600	3	0.0
1556986500	3	0.0
1556987400	3	0.0
1556988300	3	0.0
1556989200	3	0.0
1556990100	3	0.0
1556991000	3	0.0
1556991900	3	0.0
1556992800	3	0.0
1556993700	3	0.0
1556994600	3	0.0
1556995500	3	0.0
1556996400	3	0.0
1556997300	3	0.0
1556998200	3	0.0
1556999100	3	0.001
1557000000	3	0.0
1557000900	3	0.001
1557001800	3	0.001
1557002700	3	0.015
1557003600	3	0.032
1557004500	3	0.049
1557005400	3	0.048
1557006300	3	0.049
1557007200	3	0.048
1557008100	3	0.049
1557009000	3	0.048
1557009900	3	0.048
1557010800	3	0.048
1557011700	3	0.048
1557012600	3	0.047
1557013500	3	0.048
1557014400	3	0.048
1557015300	3	0.048
1557016200	3	0.048
1557017100	3	0.048
1557018000	3	0.048
1557018900	3	0.047
1557019800	3	0.049
1557020700	3	0.048
1557021600	3	0.048
1557022500	3	0.049
1557023400	3	0.048
1557024300	3	0.049
1557025200	3	0.049
1557026100	3	0.048
1557027000	3	0.05
1557027900	3	0.049
1557028800	3	0.049
1557029700	3	0.05
1557030600	3	0.049
1557031500	3	0.05
1557032400	3	0.049
1557033300	3	0.049
1557034200	3	0.049
1557035100	3	0.048
1557036000	3	0.049
1557036900	3	0.05
1557037800	3	0.049
1557038700	3	0.049
1557039600	3	0.049
1557040500	3	0.05
1557041400	3	0.049
1557042300	3	0.049
1557043200	3	0.049
1557044100	3	0.05
1557045000	3	0.049
1557045900	3	0.049
1557046800	3	0.049
1557047700	3	0.048
1557048600	3	0.048
1557049500	3	0.047
1557050400	3	0.048
1557051300	3	0.048
1557052200	3	0.048
1557053100	3	0.048
1557054000	3	0.043
1557054900	3	0.024
1557055800	3	0.025
1557056700	3	0.023
1557057600	3	0.024
1557058500	3	0.009
1557059400	3	0.007
1557060300	3	0.038
1557061200	3	0.037
1557062100	3	0.023
1557063000	3	0.013
1557063900	3	0.004
1557064800	3	0.005
1557065700	3	0.0
1557066600	3	0.0
1557067500	3	0.0
1557068400	3	0.0
1557069300	3	0.0
1557070200	3	0.0
1557071100	3	0.0
1557072000	3	0.0
1557072900	3	0.0
1557073800	3	0.0
1557074700	3	0.0
1557075600	3	0.0
1557076500	3	0.0
1557077400	3	0.0
1557078300	3	0.0
1557079200	3	0.0
1557080100	3	0.0
1557081000	3	0.0
1557081900	3	0.0
1557082800	3	0.0
1557083700	3	0.0
1557084600	3	0.0
1557085500	3	0.0
1557086400	3	0.0
1557087300	3	0.0
1557088200	3	0.016
1557089100	3	0.022
1557090000	3	0.044
1557090900	3	0.049
1557091800	3	0.048
1557092700	3	0.049
1557093600	3	0.048
1557094500	3	0.048
1557095400	3	0.048
1557096300	3	0.048
1557097200	3	0.048
1557098100	3	0.048
1557099000	3	0.048
1557099900	3	0.047
1557100800	3	0.047
1557101700	3	0.046
1557102600	3	0.048
1557103500	3	0.048
1557104400	3	0.048
1557105300	3	0.048
1557106200	3	0.049
1557107100	3	0.049
1557108000	3	0.049
1557108900	3	0.048
1557109800	3	0.049
1557110700	3	0.049
1557111600	3	0.049
1557112500	3	0.05
1557113400	3	0.049
1557114300	3	0.049
1557115200	3	0.049
1557116100	3	0.049
1557117000	3	0.05
1557117900	3	0.049
1557118800	3	0.05
1557119700	3	0.05
1557120600	3	0.05
1557121500	3	0.05
1557122400	3	0.05
1557123300	3	0.05
1557124200	3	0.051
1557125100	3	0.05
1557126000	3	0.049
1557126900	3	0.049
1557127800	3	0.05
1557128700	3	0.05
1557129600	3	0.049
1557130500	3	0.049
1557131400	3	0.05
1557132300	3	0.049
1557133200	3	0.05
1557134100	3	0.049
1557135000	3	0.049
1557135900	3	0.049
1557136800	3	0.049
1557137700	3	0.048
1557138600	3	0.016
1557139500	3	0.0
1557140400	3	0.0
1557141300	3	0.0
1557142200	3	0.0
1557143100	3	0.0
1557144000	3	0.0
1557144900	3	0.0
1557145800	3	0.0
1557146700	3	0.0
1557147600	3	0.0
1557148500	3	0.0
1557149400	3	0.0
1557150300	3	0.0
1557151200	3	0.0
1557152100	3	0.0
1557153000	3	0.0
1557153900	3	0.0
1557154800	3	0.0
1557155700	3	0.0
1557156600	3	0.0
1557157500	3	0.0
1557158400	3	0.0
1557159300	3	0.0
1557160200	3	0.0
1557161100	3	0.0
1557162000	3	0.0
1557162900	3	0.0
1557163800	3	0.0
1557164700	3	0.0
1557165600	3	0.0
1557166500	3	0.0
1557167400	3	0.0
1557168300	3	0.0
1557169200	3	0.0
1557170100	3	0.0
1557171000	3	0.0
1557171900	3	0.0
1557172800	3	0.0
1557173700	3	0.0
1557174600	3	0.0
1557175500	3	0.0
1557176400	3	0.0
1557177300	3	0.034
1557178200	3	0.049
1557179100	3	0.048
1557180000	3	0.049
1557180900	3	0.048
1557181800	3	0.048
1557182700	3	0.048
1557183600	3	0.048
1557184500	3	0.048
1557185400	3	0.048
1557186300	3	0.048
1557187200	3	0.047
1557188100	3	0.048
1557189000	3	0.048
1557189900	3	0.048
1557190800	3	0.049
1557191700	3	0.048
1557192600	3	0.049
1557193500	3	0.048
1557194400	3	0.049
1557195300	3	0.049
1557196200	3	0.048
1557197100	3	0.049
1557198000	3	0.049
1557198900	3	0.048
1557199800	3	0.049
1557200700	3	0.049
1557201600	3	0.049
1557202500	3	0.05
1557203400	3	0.049
1557204300	3	0.05
1557205200	3	0.05
1557206100	3	0.05
1557207000	3	0.049
1557207900	3	0.049
1557208800	3	0.05
1557209700	3	0.049
1557210600	3	0.049
1557211500	3	0.05
1557212400	3	0.049
1557213300	3	0.05
1557214200	3	0.049
1557215100	3	0.049
1557216000	3	0.05
1557216900	3	0.049
1557217800	3	0.049
1557218700	3	0.05
1557219600	3	0.049
1557220500	3	0.049
1557221400	3	0.049
1557222300	3	0.05
1557223200	3	0.049
1557224100	3	0.047
1557225000	3	0.012
1557225900	3	0.0
1557226800	3	0.0
1557227700	3	0.0
1557228600	3	0.0
1557229500	3	0.0
1557230400	3	0.0
1557231300	3	0.0
1557232200	3	0.0
1557233100	3	0.0
1557234000	3	0.0
1557234900	3	0.0
1557235800	3	0.0
1557236700	3	0.0
1557237600	3	0.0
1557238500	3	0.0
1557239400	3	0.0
1557240300	3	0.0
1557241200	3	0.0
1557242100	3	0.0
1557243000	3	0.0
1557243900	3	0.0
1557244800	3	0.0
1557245700	3	0.0
1557246600	3	0.0
1557247500	3	0.0
1557248400	3	0.0
1557249300	3	0.0
1557250200	3	0.0
1557251100	3	0.0
1557252000	3	0.0
1557252900	3	0.0
1557253800	3	0.0
1557254700	3	0.0
1557255600	3	0.0
1557256500	3	0.0
1557257400	3	0.0
1557258300	3	0.0
1557259200	3	0.0
1557260100	3	0.0
1557261000	3	0.0
1557261900	3	0.0
1557262800	3	0.008
1557263700	3	0.04
1557264600	3	0.049
1557265500	3	0.049
1557266400	3	0.048
1557267300	3	0.049
1557268200	3	0.048
1557269100	3	0.048
1557270000	3	0.049
1557270900	3	0.049
1557271800	3	0.049
1557272700	3	0.049
1557273600	3	0.048
1557274500	3	0.049
1557275400	3	0.049
1557276300	3	0.049
1557277200	3	0.05
1557278100	3	0.049
1557279000	3	0.049
1557279900	3	0.05
1557280800	3	0.049
1557281700	3	0.05
1557282600	3	0.05
1557283500	3	0.049
1557284400	3	0.049
1557285300	3	0.049
1557286200	3	0.049
1557287100	3	0.049
1557288000	3	0.049
1557288900	3	0.049
1557289800	3	0.049
1557290700	3	0.048
1557291600	3	0.049
1557292500	3	0.05
1557293400	3	0.05
1557294300	3	0.05
1557295200	3	0.05
1557296100	3	0.049
1557297000	3	0.05
1557297900	3	0.049
1557298800	3	0.049
1557299700	3	0.05
1557300600	3	0.05
1557301500	3	0.05
1557302400	3	0.048
1557303300	3	0.049
1557304200	3	0.049
1557305100	3	0.05
1557306000	3	0.05
1557306900	3	0.049
1557307800	3	0.05
1557308700	3	0.05
1557309600	3	0.049
1557310500	3	0.049
1557311400	3	0.038
1557312300	3	0.005
1557313200	3	0.0
1557314100	3	0.0
1557315000	3	0.0
1557315900	3	0.0
1557316800	3	0.0
1557317700	3	0.0
1557318600	3	0.0
1557319500	3	0.0
1557320400	3	0.0
1557321300	3	0.0
1557322200	3	0.0
1557323100	3	0.0
1557324000	3	0.0
1557324900	3	0.0
1557325800	3	0.0
1557326700	3	0.0
1557327600	3	0.0
1557328500	3	0.0
1557329400	3	0.0
1557330300	3	0.0
1557331200	3	0.0
1557332100	3	0.0
1557333000	3	0.0
1557333900	3	0.0
1557334800	3	0.0
1557335700	3	0.0
1557336600	3	0.0
1557337500	3	0.0
1557338400	3	0.0
1557339300	3	0.0
1557340200	3	0.0
1557341100	3	0.0
1557342000	3	0.0
1557342900	3	0.0
1557343800	3	0.0
1557344700	3	0.0
1557345600	3	0.0
1557346500	3	0.0
1557347400	3	0.0
1557348300	3	0.0
1557349200	3	0.004
1557350100	3	0.039
1557351000	3	0.047
1557351900	3	0.047
1557352800	3	0.048
1557353700	3	0.048
1557354600	3	0.047
1557355500	3	0.048
1557356400	3	0.048
1557357300	3	0.048
1557358200	3	0.049
1557359100	3	0.049
1557360000	3	0.048
1557360900	3	0.049
1557361800	3	0.049
1557362700	3	0.049
1557363600	3	0.049
1557364500	3	0.049
1557365400	3	0.05
1557366300	3	0.049
1557367200	3	0.049
1557368100	3	0.049
1557369000	3	0.049
1557369900	3	0.05
1557370800	3	0.049
1557371700	3	0.05
1557372600	3	0.049
1557373500	3	0.05
1557374400	3	0.05
1557375300	3	0.05
1557376200	3	0.05
1557377100	3	0.05
1557378000	3	0.05
1557378900	3	0.049
1557379800	3	0.05
1557380700	3	0.05
1557381600	3	0.05
1557382500	3	0.05
1557383400	3	0.049
1557384300	3	0.05
1557385200	3	0.049
1557386100	3	0.05
1557387000	3	0.05
1557387900	3	0.05
1557388800	3	0.049
1557389700	3	0.05
1557390600	3	0.05
1557391500	3	0.05
1557392400	3	0.049
1557393300	3	0.05
1557394200	3	0.049
1557395100	3	0.049
1557396000	3	0.049
1557396900	3	0.048
1557397800	3	0.025
1557398700	3	0.0
1557399600	3	0.0
1557400500	3	0.0
1557401400	3	0.0
1557402300	3	0.0
1557403200	3	0.0
1557404100	3	0.0
1557405000	3	0.0
1557405900	3	0.0
1557406800	3	0.0
1557407700	3	0.0
1557408600	3	0.0
1557409500	3	0.0
1557410400	3	0.0
1557411300	3	0.0
1557412200	3	0.0
1557413100	3	0.0
1557414000	3	0.0
1557414900	3	0.0
1557415800	3	0.0
1557416700	3	0.0
1557417600	3	0.0
1557418500	3	0.0
1557419400	3	0.0
1557420300	3	0.0
1557421200	3	0.0
1557422100	3	0.0
1557423000	3	0.0
1557423900	3	0.0
1557424800	3	0.0
1557425700	3	0.0
1557426600	3	0.0
1557427500	3	0.0
1557428400	3	0.0
1557429300	3	0.0
1557430200	3	0.0
1557431100	3	0.0
1557432000	3	0.006
1557432900	3	0.013
1557433800	3	0.023
1557434700	3	0.042
1557435600	3	0.047
1557436500	3	0.048
1557437400	3	0.048
1557438300	3	0.047
1557439200	3	0.047
1557440100	3	0.047
1557441000	3	0.047
1557441900	3	0.046
1557442800	3	0.047
1557443700	3	0.046
1557444600	3	0.047
1557445500	3	0.047
1557446400	3	0.047
1557447300	3	0.048
1557448200	3	0.047
1557449100	3	0.047
1557450000	3	0.047
1557450900	3	0.047
1557451800	3	0.047
1557452700	3	0.047
1557453600	3	0.048
1557454500	3	0.048
1557455400	3	0.046
1557456300	3	0.047
1557457200	3	0.049
1557458100	3	0.05
1557459000	3	0.049
1557459900	3	0.048
1557460800	3	0.049
1557461700	3	0.048
1557462600	3	0.048
1557463500	3	0.047
1557464400	3	0.047
1557465300	3	0.048
1557466200	3	0.047
1557467100	3	0.048
1557468000	3	0.048
1557468900	3	0.048
1557469800	3	0.047
1557470700	3	0.048
1557471600	3	0.048
1557472500	3	0.047
1557473400	3	0.047
1557474300	3	0.047
1557475200	3	0.047
1557476100	3	0.047
1557477000	3	0.047
1557477900	3	0.047
1557478800	3	0.047
1557479700	3	0.046
1557480600	3	0.047
1557481500	3	0.046
1557482400	3	0.047
1557483300	3	0.046
1557484200	3	0.047
1557485100	3	0.036
1557486000	3	0.021
1557486900	3	0.008
1557487800	3	0.0
1557488700	3	0.0
1557489600	3	0.0
1557490500	3	0.0
1557491400	3	0.0
1557492300	3	0.0
1557493200	3	0.0
1557494100	3	0.0
1557495000	3	0.0
1557495900	3	0.0
1557496800	3	0.0
1557497700	3	0.0
1557498600	3	0.0
1557499500	3	0.0
1557500400	3	0.0
1557501300	3	0.0
1557502200	3	0.0
1557503100	3	0.0
1557504000	3	0.0
1557504900	3	0.0
1557505800	3	0.0
1557506700	3	0.0
1557507600	3	0.0
1557508500	3	0.0
1557509400	3	0.0
1557510300	3	0.0
1557511200	3	0.0
1557512100	3	0.0
1557513000	3	0.0
1557513900	3	0.0
1557514800	3	0.0
1557515700	3	0.0
1557516600	3	0.0
1557517500	3	0.0
1557518400	3	0.0
1557519300	3	0.0
1557520200	3	0.0
1557521100	3	0.001
1557522000	3	0.023
1557522900	3	0.039
1557523800	3	0.049
1557524700	3	0.049
1557525600	3	0.048
1557526500	3	0.048
1557527400	3	0.047
1557528300	3	0.047
1557529200	3	0.047
1557530100	3	0.047
1557531000	3	0.047
1557531900	3	0.047
1557532800	3	0.047
1557533700	3	0.047
1557534600	3	0.047
1557535500	3	0.047
1557536400	3	0.047
1557537300	3	0.047
1557538200	3	0.047
1557539100	3	0.047
1557540000	3	0.046
1557540900	3	0.047
1557541800	3	0.047
1557542700	3	0.046
1557543600	3	0.045
1557544500	3	0.047
1557545400	3	0.046
1557546300	3	0.046
1557547200	3	0.046
1557548100	3	0.046
1557549000	3	0.047
1557549900	3	0.046
1557550800	3	0.047
1557551700	3	0.046
1557552600	3	0.047
1557553500	3	0.047
1557554400	3	0.047
1557555300	3	0.047
1557556200	3	0.046
1557557100	3	0.047
1557558000	3	0.047
1557558900	3	0.047
1557559800	3	0.047
1557560700	3	0.047
1557561600	3	0.046
1557562500	3	0.047
1557563400	3	0.046
1557564300	3	0.047
1557565200	3	0.046
1557566100	3	0.047
1557567000	3	0.046
1557567900	3	0.046
1557568800	3	0.047
1557569700	3	0.045
1557570600	3	0.045
1557571500	3	0.024
1557572400	3	0.018
1557573300	3	0.0
1557574200	3	0.0
1557575100	3	0.0
1557576000	3	0.0
1557576900	3	0.0
1557577800	3	0.0
1557578700	3	0.0
1557579600	3	0.0
1557580500	3	0.0
1557581400	3	0.0
1557582300	3	0.0
1557583200	3	0.0
1557584100	3	0.0
1557585000	3	0.0
1557585900	3	0.0
1557586800	3	0.0
1557587700	3	0.0
1557588600	3	0.0
1557589500	3	0.0
1557590400	3	0.0
1557591300	3	0.0
1557592200	3	0.0
1557593100	3	0.0
1557594000	3	0.0
1557594900	3	0.0
1557595800	3	0.0
1557596700	3	0.0
1557597600	3	0.0
1557598500	3	0.0
1557599400	3	0.0
1557600300	3	0.0
1557601200	3	0.0
1557602100	3	0.0
1557603000	3	0.0
1557603900	3	0.0
1557604800	3	0.0
1557605700	3	0.0
1557606600	3	0.0
1557607500	3	0.0
1557608400	3	0.008
1557609300	3	0.039
1557610200	3	0.047
1557611100	3	0.048
1557612000	3	0.047
1557612900	3	0.048
1557613800	3	0.048
1557614700	3	0.047
1557615600	3	0.048
1557616500	3	0.048
1557617400	3	0.047
1557618300	3	0.048
1557619200	3	0.048
1557620100	3	0.048
1557621000	3	0.048
1557621900	3	0.049
1557622800	3	0.048
1557623700	3	0.048
1557624600	3	0.047
1557625500	3	0.048
1557626400	3	0.049
1557627300	3	0.049
1557628200	3	0.049
1557629100	3	0.049
1557630000	3	0.049
1557630900	3	0.049
1557631800	3	0.05
1557632700	3	0.05
1557633600	3	0.05
1557634500	3	0.05
1557635400	3	0.05
1557636300	3	0.049
1557637200	3	0.049
1557638100	3	0.049
1557639000	3	0.048
1557639900	3	0.049
1557640800	3	0.049
1557641700	3	0.049
1557642600	3	0.049
1557643500	3	0.05
1557644400	3	0.049
1557645300	3	0.049
1557646200	3	0.05
1557647100	3	0.049
1557648000	3	0.05
1557648900	3	0.049
1557649800	3	0.05
1557650700	3	0.049
1557651600	3	0.05
1557652500	3	0.05
1557653400	3	0.05
1557654300	3	0.049
1557655200	3	0.049
1557656100	3	0.049
1557657000	3	0.02
1557657900	3	0.0
1557658800	3	0.0
1557659700	3	0.0
1557660600	3	0.0
1557661500	3	0.0
1557662400	3	0.0
1557663300	3	0.0
1557664200	3	0.0
1557665100	3	0.0
1557666000	3	0.0
1557666900	3	0.0
1557667800	3	0.0
1557668700	3	0.0
1557669600	3	0.0
1557670500	3	0.0
1557671400	3	0.0
1557672300	3	0.0
1557673200	3	0.0
1557674100	3	0.0
1557675000	3	0.0
1557675900	3	0.0
1557676800	3	0.0
1557677700	3	0.0
1557678600	3	0.0
1557679500	3	0.0
1557680400	3	0.0
1557681300	3	0.0
1557682200	3	0.0
1557683100	3	0.0
1557684000	3	0.0
1557684900	3	0.0
1557685800	3	0.0
1557686700	3	0.0
1557687600	3	0.0
1557688500	3	0.0
1557689400	3	0.0
1557690300	3	0.0
1557691200	3	0.0
1557692100	3	0.0
1557693000	3	0.0
1557693900	3	0.0
1557694800	3	0.005
1557695700	3	0.037
1557696600	3	0.048
1557697500	3	0.049
1557698400	3	0.048
1557699300	3	0.048
1557700200	3	0.048
1557701100	3	0.048
1557702000	3	0.048
1557702900	3	0.048
1557703800	3	0.047
1557704700	3	0.047
1557705600	3	0.048
1557706500	3	0.048
1557707400	3	0.047
1557708300	3	0.048
1557709200	3	0.047
1557710100	3	0.047
1557711000	3	0.048
1557711900	3	0.048
1557712800	3	0.047
1557713700	3	0.049
1557714600	3	0.048
1557715500	3	0.048
1557716400	3	0.048
1557717300	3	0.048
1557718200	3	0.048
1557719100	3	0.048
1557720000	3	0.049
1557720900	3	0.048
1557721800	3	0.048
1557722700	3	0.048
1557723600	3	0.049
1557724500	3	0.049
1557725400	3	0.049
1557726300	3	0.048
1557727200	3	0.048
1557728100	3	0.049
1557729000	3	0.048
1557729900	3	0.048
1557730800	3	0.049
1557731700	3	0.049
1557732600	3	0.049
1557733500	3	0.049
1557734400	3	0.049
1557735300	3	0.048
1557736200	3	0.049
1557737100	3	0.047
1557738000	3	0.049
1557738900	3	0.048
1557739800	3	0.048
1557740700	3	0.049
1557741600	3	0.048
1557742500	3	0.048
1557743400	3	0.031
1557744300	3	0.003
1557745200	3	0.0
1557746100	3	0.0
1557747000	3	0.0
1557747900	3	0.0
1557748800	3	0.0
1557749700	3	0.0
1557750600	3	0.0
1557751500	3	0.0
1557752400	3	0.0
1557753300	3	0.0
1557754200	3	0.0
1557755100	3	0.0
1557756000	3	0.0
1557756900	3	0.0
1557757800	3	0.0
1557758700	3	0.0
1557759600	3	0.0
1557760500	3	0.0
1557761400	3	0.0
1557762300	3	0.0
1557763200	3	0.0
1557764100	3	0.0
1557765000	3	0.0
1557765900	3	0.0
1557766800	3	0.0
1557767700	3	0.0
1557768600	3	0.0
1557769500	3	0.0
1557770400	3	0.0
1557771300	3	0.0
1557772200	3	0.0
1557773100	3	0.0
1557774000	3	0.0
1557774900	3	0.0
1557775800	3	0.0
1557776700	3	0.0
1557777600	3	0.0
1557778500	3	0.0
1557779400	3	0.0
1557780300	3	0.013
1557781200	3	0.024
1557782100	3	0.04
1557783000	3	0.048
1557783900	3	0.049
1557784800	3	0.048
1557785700	3	0.048
1557786600	3	0.046
1557787500	3	0.047
1557788400	3	0.047
1557789300	3	0.046
1557790200	3	0.048
1557791100	3	0.048
1557792000	3	0.047
1557792900	3	0.048
1557793800	3	0.048
1557794700	3	0.047
1557795600	3	0.047
1557796500	3	0.047
1557797400	3	0.048
1557798300	3	0.048
1557799200	3	0.047
1557800100	3	0.048
1557801000	3	0.049
1557801900	3	0.048
1557802800	3	0.047
1557803700	3	0.048
1557804600	3	0.048
1557805500	3	0.047
1557806400	3	0.049
1557807300	3	0.048
1557808200	3	0.049
1557809100	3	0.048
1557810000	3	0.049
1557810900	3	0.048
1557811800	3	0.048
1557812700	3	0.049
1557813600	3	0.048
1557814500	3	0.049
1557815400	3	0.049
1557816300	3	0.05
1557817200	3	0.05
1557818100	3	0.049
1557819000	3	0.05
1557819900	3	0.05
1557820800	3	0.05
1557821700	3	0.05
1557822600	3	0.05
1557823500	3	0.05
1557824400	3	0.049
1557825300	3	0.05
1557826200	3	0.05
1557827100	3	0.049
1557828000	3	0.049
1557828900	3	0.048
1557829800	3	0.037
1557830700	3	0.009
1557831600	3	0.0
1557832500	3	0.0
1557833400	3	0.0
1557834300	3	0.0
1557835200	3	0.0
1557836100	3	0.0
1557837000	3	0.0
1557837900	3	0.0
1557838800	3	0.0
1557839700	3	0.0
1557840600	3	0.0
1557841500	3	0.0
1557842400	3	0.0
1557843300	3	0.0
1557844200	3	0.0
1557845100	3	0.0
1557846000	3	0.0
1557846900	3	0.0
1557847800	3	0.0
1557848700	3	0.0
1557849600	3	0.0
1557850500	3	0.0
1557851400	3	0.0
1557852300	3	0.0
1557853200	3	0.0
1557854100	3	0.0
1557855000	3	0.0
1557855900	3	0.0
1557856800	3	0.0
1557857700	3	0.0
1557858600	3	0.0
1557859500	3	0.0
1557860400	3	0.0
1557861300	3	0.0
1557862200	3	0.0
1557863100	3	0.0
1557864000	3	0.0
1557864900	3	0.0
1557865800	3	0.0
1557866700	3	0.004
1557867600	3	0.024
1557868500	3	0.048
1557869400	3	0.049
1557870300	3	0.048
1557871200	3	0.049
1557872100	3	0.048
1557873000	3	0.048
1557873900	3	0.049
1557874800	3	0.048
1557875700	3	0.048
1557876600	3	0.048
1557877500	3	0.049
1557878400	3	0.048
1557879300	3	0.049
1557880200	3	0.048
1557881100	3	0.049
1557882000	3	0.048
1557882900	3	0.049
1557883800	3	0.048
1557884700	3	0.048
1557885600	3	0.048
1557886500	3	0.049
1557887400	3	0.049
1557888300	3	0.049
1557889200	3	0.05
1557890100	3	0.049
1557891000	3	0.049
1557891900	3	0.049
1557892800	3	0.049
1557893700	3	0.048
1557894600	3	0.05
1557895500	3	0.049
1557896400	3	0.049
1557897300	3	0.049
1557898200	3	0.049
1557899100	3	0.049
1557900000	3	0.05
1557900900	3	0.049
1557901800	3	0.05
1557902700	3	0.049
1557903600	3	0.05
1557904500	3	0.05
1557905400	3	0.05
1557906300	3	0.05
1557907200	3	0.05
1557908100	3	0.049
1557909000	3	0.05
1557909900	3	0.05
1557910800	3	0.05
1557911700	3	0.05
1557912600	3	0.05
1557913500	3	0.05
1557914400	3	0.05
1557915300	3	0.049
1557916200	3	0.031
1557917100	3	0.0
1557918000	3	0.0
1557918900	3	0.0
1557919800	3	0.0
1557920700	3	0.0
1557921600	3	0.0
1557922500	3	0.0
1557923400	3	0.0
1557924300	3	0.0
1557925200	3	0.0
1557926100	3	0.0
1557927000	3	0.0
1557927900	3	0.0
1557928800	3	0.0
1557929700	3	0.0
1557930600	3	0.0
1557931500	3	0.0
1557932400	3	0.0
1557933300	3	0.0
1557934200	3	0.0
1557935100	3	0.0
1557936000	3	0.0
1557936900	3	0.0
1557937800	3	0.0
1557938700	3	0.0
1557939600	3	0.0
1557940500	3	0.0
1557941400	3	0.0
1557942300	3	0.0
1557943200	3	0.0
1557944100	3	0.0
1557945000	3	0.0
1557945900	3	0.0
1557946800	3	0.0
1557947700	3	0.0
1557948600	3	0.0
1557949500	3	0.0
1557950400	3	0.0
1557951300	3	0.0
1557952200	3	0.0
1557953100	3	0.0
1557954000	3	0.01
1557954900	3	0.041
1557955800	3	0.048
1557956700	3	0.047
1557957600	3	0.048
1557958500	3	0.048
1557959400	3	0.047
1557960300	3	0.049
1557961200	3	0.048
1557962100	3	0.048
1557963000	3	0.049
1557963900	3	0.047
1557964800	3	0.048
1557965700	3	0.047
1557966600	3	0.047
1557967500	3	0.048
1557968400	3	0.049
1557969300	3	0.048
1557970200	3	0.049
1557971100	3	0.048
1557972000	3	0.048
1557972900	3	0.048
1557973800	3	0.049
1557974700	3	0.048
1557975600	3	0.048
1557976500	3	0.048
1557977400	3	0.049
1557978300	3	0.048
1557979200	3	0.049
1557980100	3	0.049
1557981000	3	0.049
1557981900	3	0.049
1557982800	3	0.05
1557983700	3	0.049
1557984600	3	0.05
1557985500	3	0.05
1557986400	3	0.05
1557987300	3	0.049
1557988200	3	0.05
1557989100	3	0.049
1557990000	3	0.05
1557990900	3	0.049
1557991800	3	0.049
1557992700	3	0.048
1557993600	3	0.048
1557994500	3	0.049
1557995400	3	0.048
1557996300	3	0.049
1557997200	3	0.049
1557998100	3	0.048
1557999000	3	0.049
1557999900	3	0.048
1558000800	3	0.048
1558001700	3	0.048
1558002600	3	0.031
1558003500	3	0.002
1558004400	3	0.0
1558005300	3	0.0
1558006200	3	0.0
1558007100	3	0.0
1558008000	3	0.0
1558008900	3	0.0
1558009800	3	0.0
1558010700	3	0.0
1558011600	3	0.0
1558012500	3	0.0
1558013400	3	0.0
1558014300	3	0.0
1558015200	3	0.0
1558016100	3	0.0
1558017000	3	0.0
1558017900	3	0.0
1558018800	3	0.0
1558019700	3	0.0
1558020600	3	0.0
1558021500	3	0.0
1558022400	3	0.0
1558023300	3	0.0
1558024200	3	0.0
1558025100	3	0.0
1558026000	3	0.0
1558026900	3	0.0
1558027800	3	0.0
1558028700	3	0.0
1558029600	3	0.0
1558030500	3	0.0
1558031400	3	0.0
1558032300	3	0.0
1558033200	3	0.0
1558034100	3	0.0
1558035000	3	0.0
1558035900	3	0.0
1558036800	3	0.0
1558037700	3	0.0
1558038600	3	0.0
1558039500	3	0.0
1558040400	3	0.024
1558041300	3	0.048
1558042200	3	0.049
1558043100	3	0.048
1558044000	3	0.049
1558044900	3	0.048
1558045800	3	0.048
1558046700	3	0.049
1558047600	3	0.048
1558048500	3	0.048
1558049400	3	0.048
1558050300	3	0.049
1558051200	3	0.047
1558052100	3	0.049
1558053000	3	0.047
1558053900	3	0.048
1558054800	3	0.048
1558055700	3	0.047
1558056600	3	0.047
1558057500	3	0.048
1558058400	3	0.048
1558059300	3	0.047
1558060200	3	0.047
1558061100	3	0.047
1558062000	3	0.047
1558062900	3	0.048
1558063800	3	0.047
1558064700	3	0.048
1558065600	3	0.048
1558066500	3	0.047
1558067400	3	0.048
1558068300	3	0.048
1558069200	3	0.048
1558070100	3	0.048
1558071000	3	0.048
1558071900	3	0.048
1558072800	3	0.048
1558073700	3	0.048
1558074600	3	0.048
1558075500	3	0.048
1558076400	3	0.047
1558077300	3	0.048
1558078200	3	0.048
1558079100	3	0.047
1558080000	3	0.048
1558080900	3	0.048
1558081800	3	0.047
1558082700	3	0.048
1558083600	3	0.047
1558084500	3	0.047
1558085400	3	0.047
1558086300	3	0.047
1558087200	3	0.047
1558088100	3	0.047
1558089000	3	0.019
1558089900	3	0.0
1558090800	3	0.0
1558091700	3	0.0
1558092600	3	0.0
1558093500	3	0.0
1558094400	3	0.0
1558095300	3	0.0
1558096200	3	0.0
1558097100	3	0.0
1558098000	3	0.0
1558098900	3	0.0
1558099800	3	0.0
1558100700	3	0.0
1558101600	3	0.0
1558102500	3	0.0
1558103400	3	0.0
1558103400	6	0.064
1558104300	3	0.0
1558104300	6	0.061
1558105200	3	0.0
1558105200	6	0.026
1558106100	3	0.0
1558106100	6	0.021
1558107000	3	0.0
1558107000	6	0.044
1558107900	3	0.0
1558107900	6	0.04
1558108800	3	0.0
1558108800	6	0.039
1558109700	3	0.0
1558109700	6	0.008
1558110600	3	0.0
1558110600	6	0.001
1558111500	3	0.0
1558111500	6	0.001
1558112400	3	0.0
1558112400	6	0.001
1558113300	3	0.0
1558113300	6	0.021
1558114200	3	0.0
1558114200	6	0.025
1558115100	3	0.0
1558115100	6	0.119
1558116000	3	0.0
1558116000	6	0.226
1558116900	3	0.0
1558116900	6	0.051
1558117800	3	0.0
1558117800	6	0.066
1558118700	3	0.0
1558118700	6	0.05
1558119600	3	0.0
1558119600	6	0.039
1558120500	3	0.0
1558120500	6	0.038
1558121400	3	0.0
1558121400	6	0.017
1558122300	3	0.0
1558122300	6	0.0
1558123200	3	0.0
1558123200	6	0.0
1558124100	3	0.0
1558124100	6	0.0
1558125000	3	0.0
1558125000	6	0.0
1558125900	3	0.0
1558125900	6	0.0
1558126800	3	0.019
1558126800	6	0.0
1558127700	3	0.048
1558127700	6	0.0
1558128600	3	0.048
1558128600	6	0.01
1558129500	3	0.048
1558129500	6	0.099
1558130400	3	0.048
1558130400	6	0.094
1558131300	3	0.048
1558131300	6	0.082
1558132200	3	0.047
1558132200	6	0.063
1558133100	3	0.048
1558133100	6	0.057
1558134000	3	0.047
1558134000	6	0.023
1558134900	3	0.047
1558134900	6	0.029
1558135800	3	0.048
1558135800	6	0.06
1558136700	3	0.047
1558136700	6	0.058
1558137600	3	0.047
1558137600	6	0.058
1558138500	3	0.048
1558138500	6	0.058
1558139400	3	0.046
1558139400	6	0.053
1558140300	3	0.048
1558140300	6	0.052
1558141200	3	0.047
1558141200	6	0.048
1558142100	3	0.047
1558142100	6	0.047
1558143000	3	0.047
1558143000	6	0.05
1558143900	3	0.047
1558143900	6	0.046
1558144800	3	0.046
1558144800	6	0.047
1558145700	3	0.047
1558145700	6	0.047
1558146600	3	0.047
1558146600	6	0.046
1558147500	3	0.047
1558147500	6	0.047
1558148400	3	0.048
1558148400	6	0.046
1558149300	3	0.047
1558149300	6	0.047
1558150200	3	0.048
1558150200	6	0.047
1558151100	3	0.047
1558151100	6	0.034
1558152000	3	0.048
1558152000	6	0.01
1558152900	3	0.047
1558152900	6	0.01
1558153800	3	0.047
1558153800	6	0.01
1558154700	3	0.048
1558154700	6	0.011
1558155600	3	0.047
1558155600	6	0.044
1558156500	3	0.048
1558156500	6	0.049
1558157400	3	0.048
1558157400	6	0.048
1558158300	3	0.048
1558158300	6	0.045
1558159200	3	0.049
1558159200	6	0.018
1558160100	3	0.049
1558160100	6	0.002
1558161000	3	0.048
1558161000	6	0.001
1558161900	3	0.049
1558161900	6	0.002
1558162800	3	0.048
1558162800	6	0.001
1558163700	3	0.048
1558163700	6	0.002
1558164600	3	0.049
1558164600	6	0.001
1558165500	3	0.048
1558165500	6	0.002
1558166400	3	0.048
1558166400	6	0.001
1558167300	3	0.048
1558167300	6	0.001
1558168200	3	0.048
1558168200	6	0.026
1558169100	3	0.048
1558169100	6	0.028
1558170000	3	0.048
1558170000	6	0.018
1558170900	3	0.048
1558170900	6	0.003
1558171800	3	0.048
1558171800	6	0.045
1558172700	3	0.048
1558172700	6	0.043
1558173600	3	0.047
1558173600	6	0.042
1558174500	3	0.048
1558174500	6	0.041
1558175400	3	0.031
1558175400	6	0.039
1558176300	3	0.0
1558176300	6	0.034
1558177200	3	0.0
1558177200	6	0.002
1558178100	3	0.0
1558178100	6	0.006
1558179000	3	0.0
1558179000	6	0.038
1558179900	3	0.0
1558179900	6	0.068
1558180800	3	0.0
1558180800	6	0.046
1558181700	3	0.0
1558181700	6	0.037
1558182600	3	0.0
1558182600	6	0.004
1558183500	3	0.0
1558183500	6	0.0
1558184400	3	0.0
1558184400	6	0.007
1558185300	3	0.0
1558185300	6	0.01
1558186200	3	0.0
1558186200	6	0.01
1558187100	3	0.0
1558187100	6	0.019
1558188000	3	0.0
1558188000	6	0.03
1558188900	3	0.0
1558188900	6	0.029
1558189800	3	0.0
1558189800	6	0.033
1558190700	3	0.0
1558190700	6	0.072
1558191600	3	0.0
1558191600	6	0.071
1558192500	3	0.0
1558192500	6	0.069
1558193400	3	0.0
1558193400	6	0.065
1558194300	3	0.0
1558194300	6	0.065
1558195200	3	0.0
1558195200	6	0.065
1558196100	3	0.0
1558196100	6	0.065
1558197000	3	0.0
1558197000	6	0.064
1558197900	3	0.0
1558197900	6	0.063
1558198800	3	0.0
1558198800	6	0.042
1558199700	3	0.0
1558199700	6	0.026
1558200600	3	0.0
1558200600	6	0.027
1558201500	3	0.0
1558201500	6	0.03
1558202400	3	0.0
1558202400	6	0.028
1558203300	3	0.0
1558203300	6	0.026
1558204200	3	0.0
1558204200	6	0.035
1558205100	3	0.0
1558205100	6	0.064
1558206000	3	0.0
1558206000	6	0.075
1558206900	3	0.0
1558206900	6	0.074
1558207800	3	0.0
1558207800	6	0.067
1558208700	3	0.0
1558208700	6	0.036
1558209600	3	0.0
1558209600	6	0.014
1558210500	3	0.0
1558210500	6	0.016
1558211400	3	0.0
1558211400	6	0.043
1558212300	3	0.002
1558212300	6	0.062
1558213200	3	0.035
1558213200	6	0.062
1558214100	3	0.048
1558214100	6	0.038
1558215000	3	0.048
1558215000	6	0.065
1558215900	3	0.047
1558215900	6	0.076
1558216800	3	0.048
1558216800	6	0.074
1558217700	3	0.047
1558217700	6	0.058
1558218600	3	0.048
1558218600	6	0.045
1558219500	3	0.047
1558219500	6	0.016
1558220400	3	0.048
1558220400	6	0.02
1558221300	3	0.047
1558221300	6	0.043
1558222200	3	0.048
1558222200	6	0.052
1558223100	3	0.048
1558223100	6	0.016
1558224000	3	0.048
1558224000	6	0.01
1558224900	3	0.047
1558224900	6	0.01
1558225800	3	0.048
1558225800	6	0.01
1558226700	3	0.048
1558226700	6	0.01
1558227600	3	0.048
1558227600	6	0.011
1558228500	3	0.048
1558228500	6	0.002
1558229400	3	0.048
1558229400	6	0.005
1558230300	3	0.048
1558230300	6	0.001
1558231200	3	0.049
1558231200	6	0.004
1558232100	3	0.048
1558232100	6	0.01
1558233000	3	0.048
1558233000	6	0.045
1558233900	3	0.049
1558233900	6	0.055
1558234800	3	0.048
1558234800	6	0.045
1558235700	3	0.049
1558235700	6	0.012
1558236600	3	0.048
1558236600	6	0.002
1558237500	3	0.049
1558237500	6	0.003
1558238400	3	0.049
1558238400	6	0.002
1558239300	3	0.049
1558239300	6	0.002
1558240200	3	0.05
1558240200	6	0.003
1558241100	3	0.049
1558241100	6	0.002
1558242000	3	0.049
1558242000	6	0.003
1558242900	3	0.05
1558242900	6	0.003
1558243800	3	0.049
1558243800	6	0.002
1558244700	3	0.049
1558244700	6	0.002
1558245600	3	0.049
1558245600	6	0.017
1558246500	3	0.05
1558246500	6	0.043
1558247400	3	0.049
1558247400	6	0.042
1558248300	3	0.049
1558248300	6	0.023
1558249200	3	0.05
1558249200	6	0.003
1558250100	3	0.049
1558250100	6	0.002
1558251000	3	0.049
1558251000	6	0.002
1558251900	3	0.049
1558251900	6	0.002
1558252800	3	0.05
1558252800	6	0.002
1558253700	3	0.05
1558253700	6	0.002
1558254600	3	0.05
1558254600	6	0.002
1558255500	3	0.049
1558255500	6	0.002
1558256400	3	0.049
1558256400	6	0.004
1558257300	3	0.05
1558257300	6	0.002
1558258200	3	0.05
1558258200	6	0.003
1558259100	3	0.049
1558259100	6	0.012
1558260000	3	0.05
1558260000	6	0.044
1558260900	3	0.05
1558260900	6	0.041
1558261800	3	0.05
1558261800	6	0.028
1558262700	3	0.047
1558262700	6	0.002
1558263600	3	0.031
1558263600	6	0.004
1558264500	3	0.024
1558264500	6	0.024
1558265400	3	0.023
1558265400	6	0.032
1558266300	3	0.001
1558266300	6	0.06
1558267200	3	0.0
1558267200	6	0.064
1558268100	3	0.0
1558268100	6	0.046
1558269000	3	0.0
1558269000	6	0.021
1558269900	3	0.0
1558269900	6	0.032
1558270800	3	0.0
1558270800	6	0.027
1558271700	3	0.0
1558271700	6	0.025
1558272600	3	0.0
1558272600	6	0.025
1558273500	3	0.0
1558273500	6	0.035
1558274400	3	0.0
1558274400	6	0.038
1558275300	3	0.0
1558275300	6	0.042
1558276200	3	0.0
1558276200	6	0.08
1558277100	3	0.0
1558277100	6	0.071
1558278000	3	0.0
1558278000	6	0.073
1558278900	3	0.0
1558278900	6	0.058
1558279800	3	0.0
1558279800	6	0.031
1558280700	3	0.0
1558280700	6	0.032
1558281600	3	0.0
1558281600	6	0.031
1558282500	3	0.0
1558282500	6	0.011
1558283400	3	0.0
1558283400	6	0.011
1558284300	3	0.0
1558284300	6	0.011
1558285200	3	0.0
1558285200	6	0.011
1558286100	3	0.0
1558286100	6	0.01
1558287000	3	0.0
1558287000	6	0.01
1558287900	3	0.0
1558287900	6	0.035
1558288800	3	0.0
1558288800	6	0.053
1558289700	3	0.0
1558289700	6	0.061
1558290600	3	0.0
[truncated: 8,000 more rows]
